# Supplementary material for: In VivoEvaluation of Ethanolic Extract ofZingiber officinaleRhizomes for Its Protective Effect against Liver Cirrhosis
Source: Hindawi journal article supplement (doi:10.1155/2013/918460), 2013-01-01
Supplement: f1 [file 918460.f1.pdf]

**Table 1: Effect of ERZO on liver function biochemical parameters in rats**

|                | <b>Liver function tests</b> |                    |                    |                          |                        |                           |
|----------------|-----------------------------|--------------------|--------------------|--------------------------|------------------------|---------------------------|
| <b>Dosage</b>  | <b>ALT<br/>U/L</b>          | <b>ALP<br/>U/L</b> | <b>AST<br/>U/L</b> | <b>T. Bil<br/>Umol/L</b> | <b>Albumin<br/>g/L</b> | <b>T. protein<br/>g/L</b> |
| <b>Male</b>    |                             |                    |                    |                          |                        |                           |
| Vehicle        | 44.12 + 6.17                | 142.55 ± 18.38     | 193.51 ± 22.51     | 1.84± 0.77               | 30.22 ± 7.05           | 56.50± 8.24               |
| 2,000<br>mg/kg | 42.88 + 6.07                | 140.81 ± 15.77     | 183.50 ± 20.27     | 2.00± 0.85               | 28.75 ± 6.35           | 54.88 ± 9.05              |
| 5,000<br>mg/kg | 43.65 + 5.28                | 139.79 ± 16.24     | 195.11 ± 21.67     | 2.07 ± 0.71              | 31.52 ± 7.78           | 51.11 ± 8.57              |
|                |                             |                    |                    |                          |                        |                           |
| <b>Female</b>  |                             |                    |                    |                          |                        |                           |
| Vehicle        | 46.15 + 5.36                | 144.38 ± 15.73     | 197.65 ± 21.26     | 2.01 ± 0.51              | 35.35± 9.77            | 57.55 ± 8.83              |
| 2,000<br>mg/kg | 42.91 + 6.13                | 140.45 ± 15.05     | 191.87 ± 20.66     | 1.89± 0.68               | 32.37 ±8.03            | 55.26 ± 10.03             |
| 5,000<br>mg/kg | 44.08 + 6.44                | 146.37 ± 14.85     | 188.30 ± 22.13     | 2.15 ± 0.85              | 37.98 ± 9.19           | 53.25 ± 8.23              |

All values have been expressed as mean ±S.E.M. Means are significantly different at  $p < 0.05$

**Table 2: Effect of ERZO on renal function biochemical parameters in rats**

|                | <b>Kidney function tests</b> |                  |             |                  |               |                 |
|----------------|------------------------------|------------------|-------------|------------------|---------------|-----------------|
| <b>Dosage</b>  | <b>Calcium</b>               | <b>Createnin</b> | <b>Urea</b> | <b>Potassium</b> | <b>Sodium</b> | <b>Chloride</b> |
| <b>Male</b>    |                              |                  |             |                  |               |                 |
| Vehicle        | 2.29 ±0.56                   | 61.55 ± 6.17     | 5.55 ± 0.89 | 4.03 ± 0.83      | 152.01± 10.24 | 112.32± 8.05    |
| 2,000<br>mg/kg | 2.18 ± 0.54                  | 63.36 ± 5.11     | 5.45 ± 0.77 | 4.33 ± 0.95      | 150.24±9.837  | 118.19± 9.64    |
| 5,000<br>mg/kg | 2.44 ± 0.37                  | 68.08 ± 5.86     | 5.20 ± 0.69 | 4.25 ± 0.80      | 148.65±9.55   | 111.33 ± 10.03  |
|                |                              |                  |             |                  |               |                 |
| <b>Female</b>  |                              |                  |             |                  |               |                 |
| Vehicle        | 2.55± 0.58                   | 65.55± 5.48      | 5.59 ± 0.84 | 4.17 ± 0.92      | 150.45± 12.05 | 115.51±10.48    |
| 2,000<br>mg/kg | 2.46 ± 0.73                  | 63.28 ±7.13      | 5.85 ± 0.88 | 4.55 ±0.80       | 145.85± 11.13 | 117.21±11.11    |
| 5,000<br>mg/kg | 2.35 ± 0.51                  | 70.11 ± 5.06     | 5.72 ± 0.56 | 4.48 ± 0.78      | 148.78±11.67  | 122.98±10.15    |

All values have been expressed as mean ±S.E.M. Means are significantly different at  $p < 0.05$

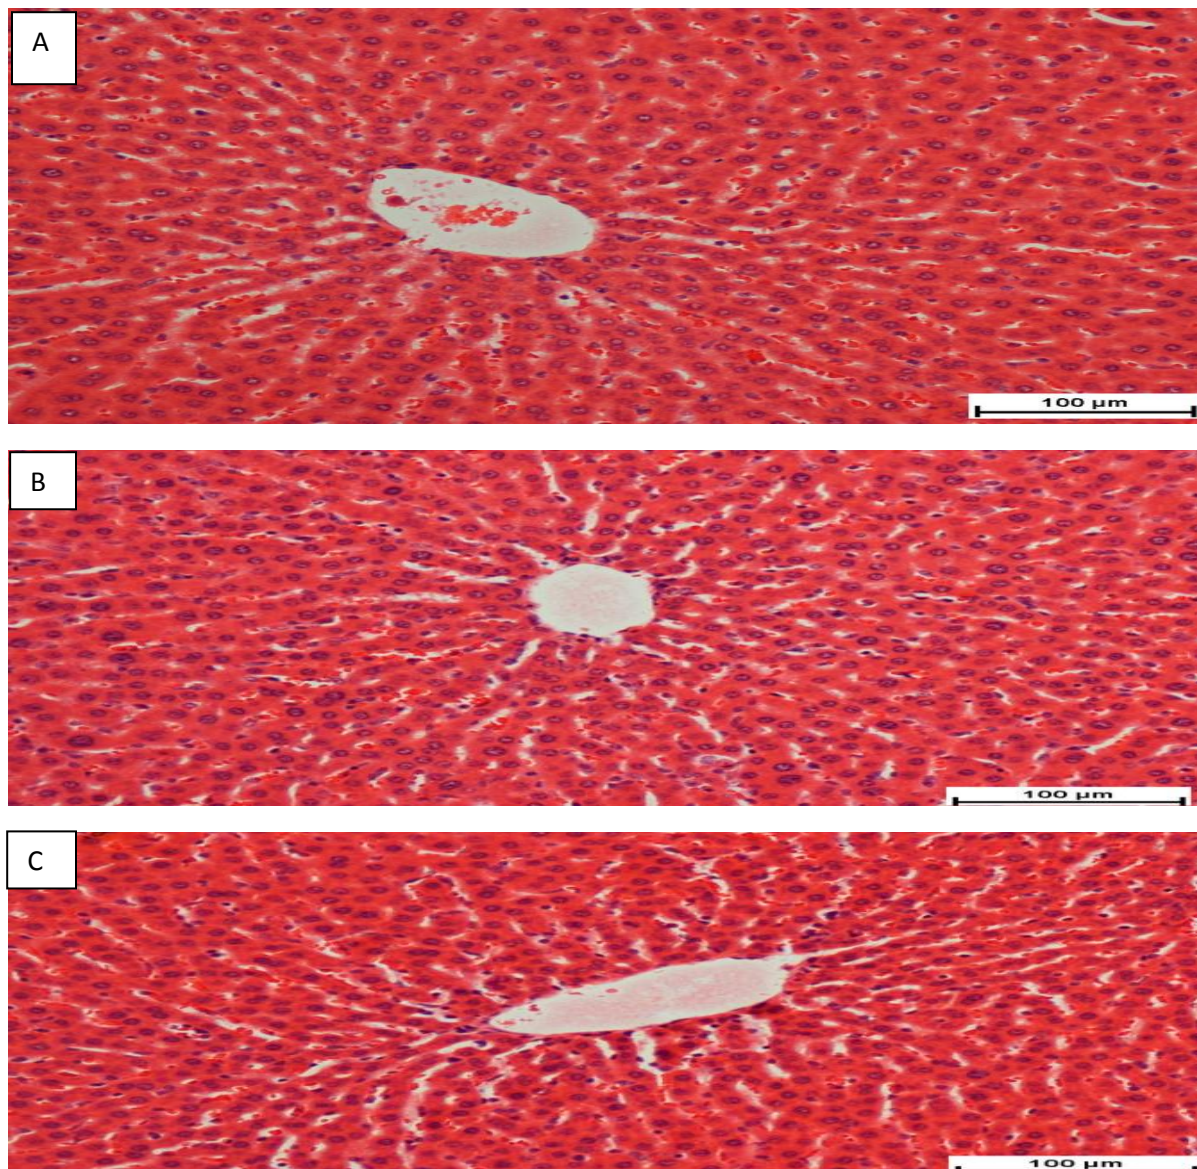

**Figure 1:** Histological section of liver in: (A) animal treated with vehicle (10% Tween 20), (B) animal treated with (ERZO, 2 g/kg) and (C) animal treated with (ERZO, 5 g/kg), respectively, showed normal structural appearance of liver parenchyma (H&E stain 20 x).



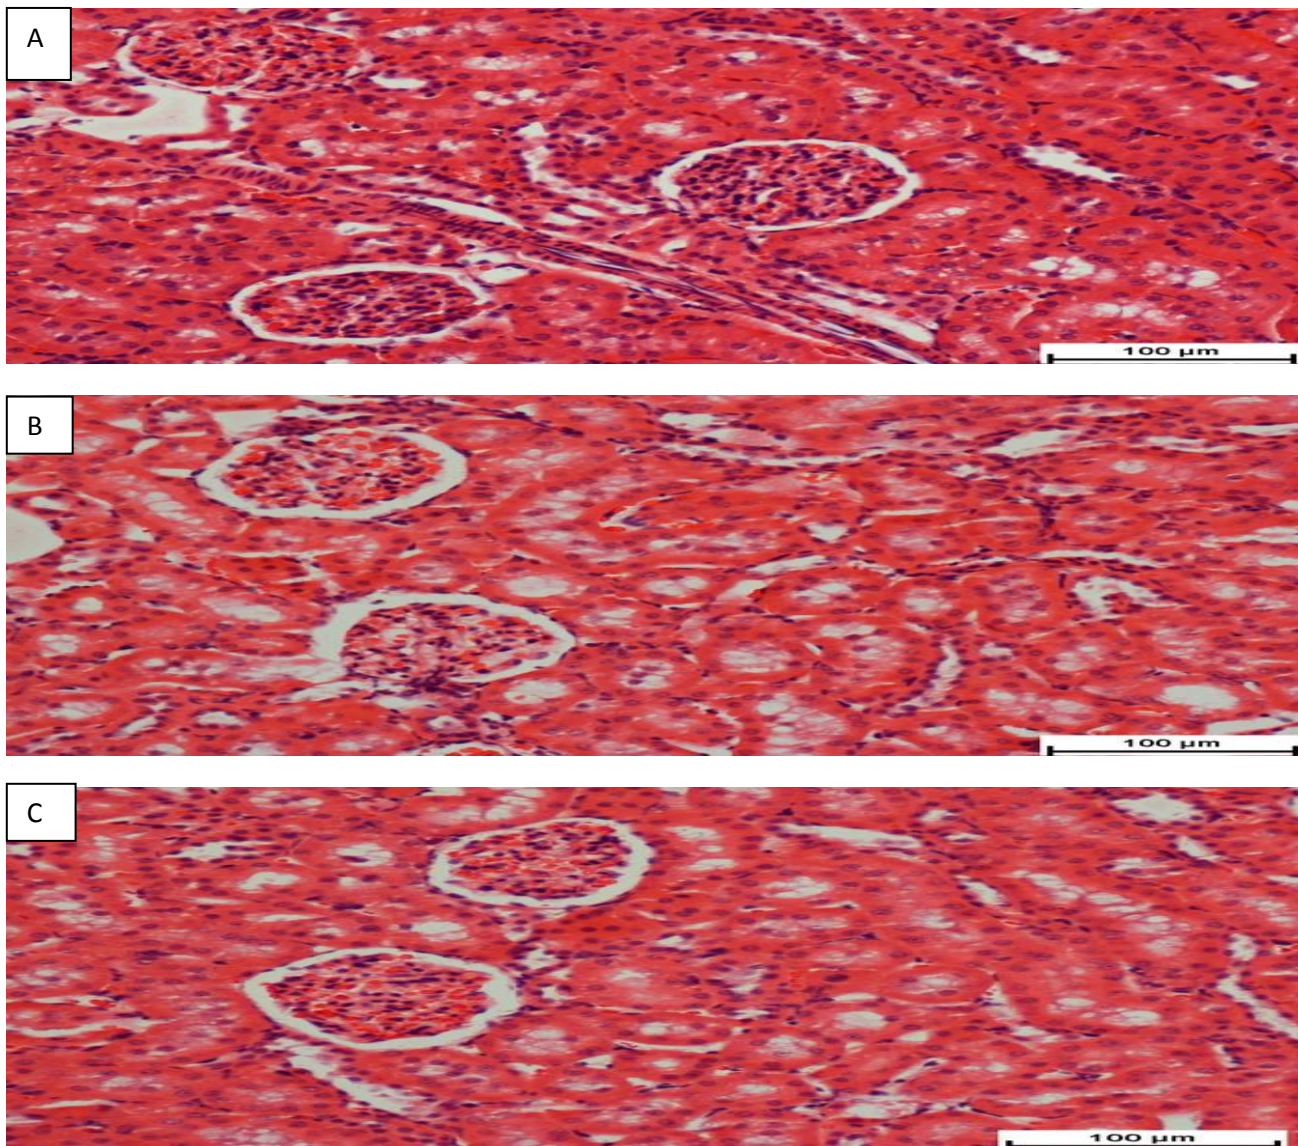

**Figure: 2:** Histological section of kidney in: (A) animal treated with vehicle (10% Tween 20), (B) animal treated with (ERZO, 2 g/kg) and (C) animal treated with (ERZO, 5 g/kg), respectively, showed normal structural appearance of kidney parenchyma (H&E stain 20 x).
